# Supplementary material for: Ethanol-tolerant polyethyleneimine functionalized palladium nanowires in alkaline media: the “molecular window gauze” induced the selectivity for the oxygen reduction reaction
Source: Royal Society of Chemistry journal article supplement (doi:10.1039/c5ta06644a), 2015-01-01
Supplement: c5ta06644a1.pdf [file c5ta06644a1.pdf]

Ethanol-tolerant polyethyleneimine functionalized palladium nanowires  
in alkaline media: The “molecular window gauze” induced the selectivity  
for the oxygen reduction reaction

Guang-Rui Xu,<sup>a</sup> Feng-Yi Liu,<sup>b</sup> Zong-Huai Liu <sup>a</sup> and Yu Chen<sup>a\*</sup>

<sup>a</sup> Key Laboratory of Macromolecular Science of Shaanxi Province, School of Materials Science and Engineering, Shaanxi Normal University, Xi'an 710062, PR China.

<sup>b</sup> School of Chemistry & Chemical Engineering, Shaanxi Normal University, Xi'an 710062, P.R. China

\* Corresponding author

E-mail addresses: ndchenyu@gmail.com (Y. Chen)

## Molecular dynamics simulation

Molecular dynamics simulations with MM+ force field were carried out to understand the adsorption mechanism of PEI polymers on Pd (111) surface. The systems were built by putting 3 PEI polymers (each with 571~648 atoms, 3074~3490 Kg/mol in weight), in random orientation, above a double-layer, 20x20 atom Pd surface (800 atoms in total). Simulations were carried out in 300K and with time step of 2.0 fs. The trajectories were lasted at least 2 ns before being terminated. During simulation, atoms on Pd (111) layers were frozen. All the MD simulations were performed using the GROMACS package (version 5.0.5).<sup>1-3</sup>

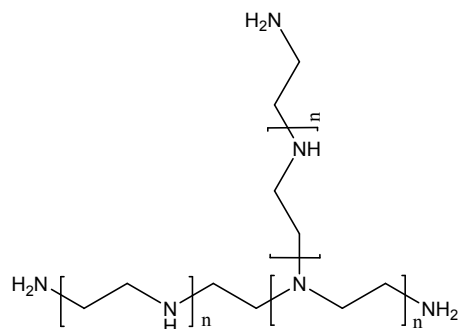

**Scheme S1** Molecular structure of PEI.

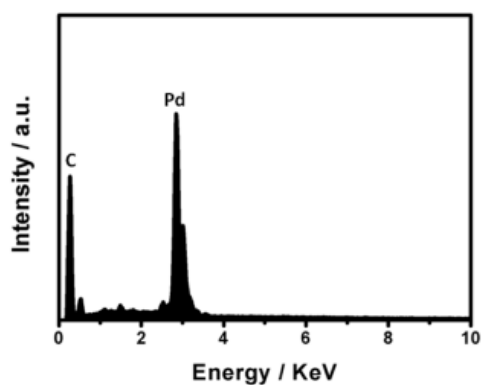

**Fig. S1** EDX spectrum of Pd-NWs@PEI.

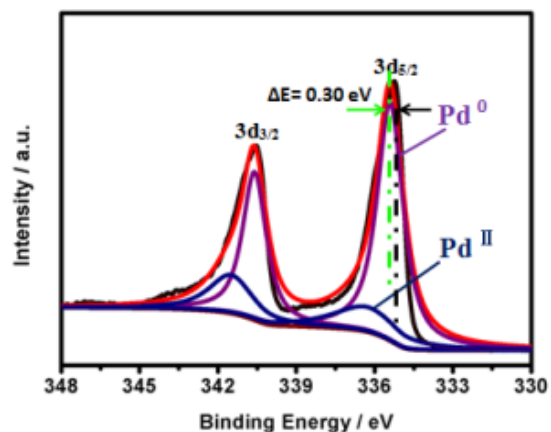

**Fig. S2** Pd 3d XPS spectrum of Pd-NWs@PEI. The vertical black dotted lines represent the standard value of Pd 3d<sub>5/2</sub>.<sup>4</sup>

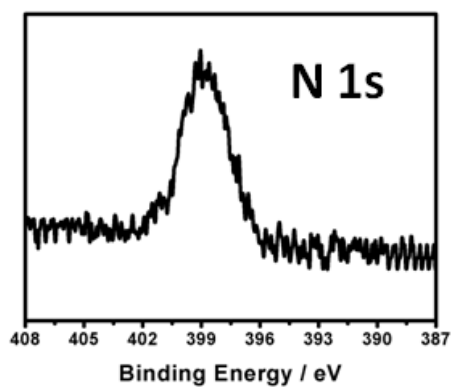

**Fig. S3** N1s XPS spectrum of Pd-NWs@PEI.

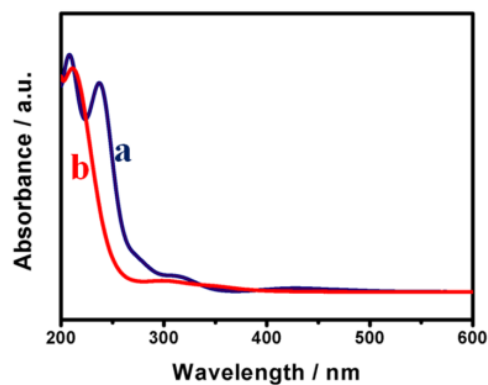

**Fig. S4** UV-vis absorption spectra of (a) single-component  $K_2PdCl_4$  solution and (b) the mixture solution of  $K_2PdCl_4$  and PEI.

The UV–vis absorption peaks of single-component  $\text{K}_2\text{PdCl}_4$  solution locate at 207 and 235 nm, which can be ascribed to ligand–to–metal charge transfer bands of  $\text{PdCl}_3(\text{H}_2\text{O})^-$  species.<sup>5, 6</sup> After adding PEI, the peaks at 208 and 237 nm disappear and a new peak at 211 nm appear, indicating that PEI can interact with  $\text{K}_2\text{PdCl}_4$  to generate PEI- $\text{Pd}^{\text{II}}$  complex.

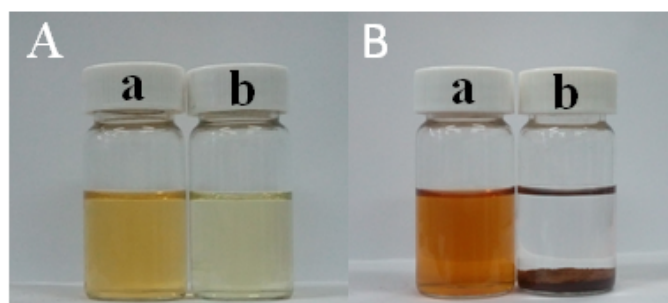

**Fig. S5** Photographs of (A) the mixture solution of  $\text{K}_2\text{PdCl}_4$  and PEI and (B) the single-component  $\text{K}_2\text{PdCl}_4$  solution (a) before and (b) after adjusting the solution pH to 7.5.

When the pH of the mixture solution of  $\text{K}_2\text{PdCl}_4$  and PEI is adjusted to 7.5, a light yellow solution is obtained (Fig.S5A-b). In a controlled experiment, a lot of red flocculent  $\text{PdO}\cdot\text{H}_2\text{O}$  precipitation is generated immediately in a few seconds after adjusting the pH of single-component  $\text{PdCl}_2$  solution to 7.5<sup>7</sup> (Fig.S5B-b). These above experimental phenomena further confirm that PEI can interact with  $\text{K}_2\text{PdCl}_4$  to generate PEI- $\text{Pd}^{\text{II}}$  complex via coordination interaction.

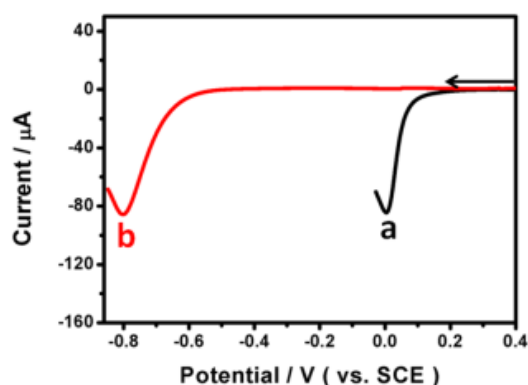

**Fig. S6** Linear sweeping voltammograms of (a) the single-component  $\text{K}_2\text{PdCl}_4$  solution and (b) the mixture solution of  $\text{K}_2\text{PdCl}_4$  and PEI in 0.1 M KCl electrolyte (pH 2.0) at the glassy carbon at a scan rate of  $100 \text{ mV s}^{-1}$ .

As observed, the reduction peak potential of PEI- $\text{Pd}^{\text{II}}$  complex negatively shifts ca. 800 mV compared to that of  $\text{K}_2\text{PdCl}_4$ .

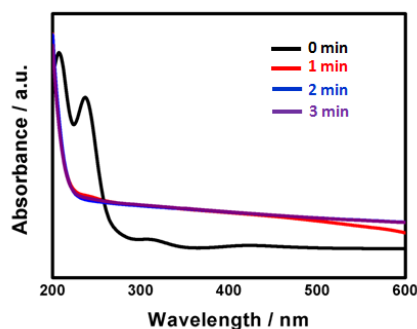

**Fig. S7** Time-dependent UV-vis absorption spectra of the single-component  $\text{K}_2\text{PdCl}_4$  solution after addition of  $\text{N}_2\text{H}_4 \cdot \text{H}_2\text{O}$ .

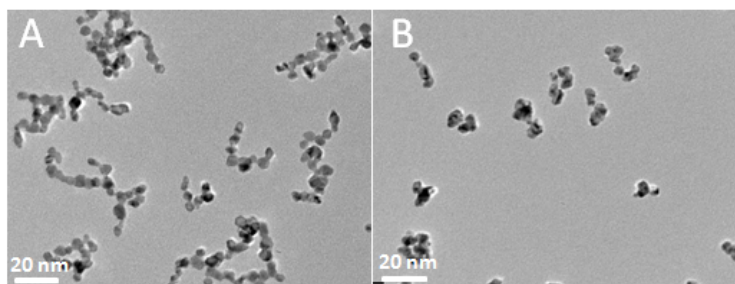

**Fig. S8** TEM images of Pd-NWs@PEI synthesized at (A) pH 7.0 and (B) pH 3.0.

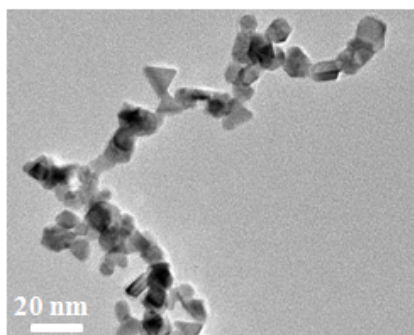

**Fig. S9** TEM image of the obtained Pd nanonecklaces by increasing the amount of  $\text{N}_2\text{H}_4 \cdot \text{H}_2\text{O}$  to 2.0 mL.

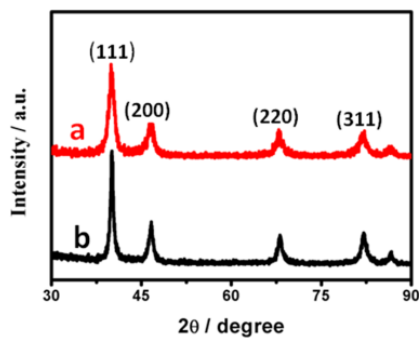

**Fig. S10** XRD patterns of (a) Pd-NWs@PEI and (b) commercial Pd black.

According to the Scherrer formula, the average particle sizes of Pd-NWs@PEI and Pd black are calculated from the (111) diffraction peak to be ca. 4.7 and 19.1 nm, respectively.

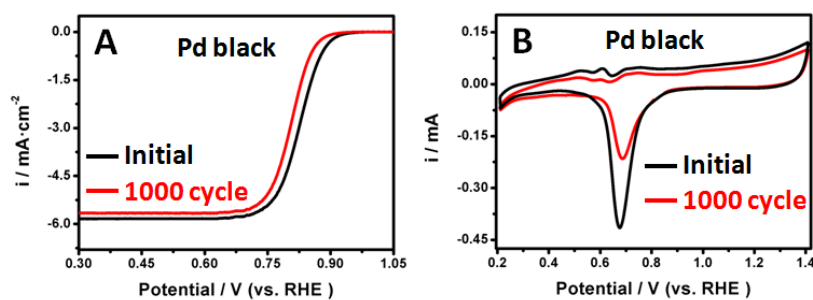

**Fig. S11** (A) ORR polarization curves of commercial Pd black before and after 1000 potential cycles in O<sub>2</sub>-saturated 0.1 M NaOH solution at a scan rate of 5 mV s<sup>-1</sup> and rotation rate of 1600 rpm. (B) CV curves of commercial Pd black before and after 1000 cycles in N<sub>2</sub>-saturated 0.1 M NaOH solution at a scan rate of 50 mV s<sup>-1</sup>.

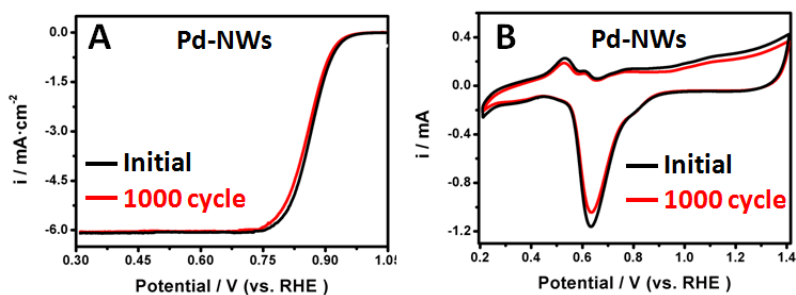

**Fig. S12** (A) ORR polarization curves of Pd-NWs@PEI before and after 1000 potential cycles in O<sub>2</sub>-saturated 0.1 M NaOH solution at a scan rate of 5 mV s<sup>-1</sup> and rotation rate of 1600 rpm. (B) CV curves of Pd-NWs@PEI before and after 1000 cycles in N<sub>2</sub>-saturated 0.1 M NaOH solution at a scan rate of 50 mV s<sup>-1</sup>.

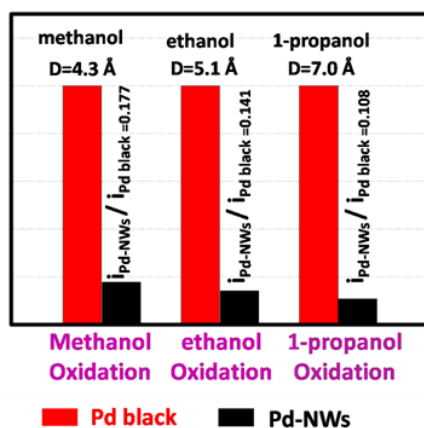

**Fig. S13** The ratios of specific peak current densities of methanol, ethanol, and 1-propanol at Pd-NWs@PEI ( $i_{\text{Pd-NWs@PEI}}$ ) to these at commercial Pd black ( $i_{\text{Pd}}$ ). For convenience, the specific peak current densities of methanol, ethanol, and 1-propanol at Pd black were normalized to 1. A smaller value of the  $i_{\text{Pdpt@ptpd}}/i_{\text{Pt}}$  implies better alcohol tolerant ability. As observed, the value of the  $i_{\text{Pd-NWs@PEI}}/i_{\text{Pd}}$  decreases with increasing molecule size of alcohol.

## References

1. J. R. C. Salgado, E. Antolini and E. R. Gonzalez, *Appl. Catal. B-Environ.*, 2005, **57**, 283.
2. J. H. Yang, W. J. Zhou, C. H. Cheng, J. Y. Lee and Z. L. Liu, *Acs Appl. Mater. Inter.*, 2010, **2**, 119.
3. K. Kamiya, R. Kamai, K. Hashimoto and S. Nakanishi, *Nat. Commun.*, 2014, **5**, 5040.
4. J. Moulder, W. Stickle, P. Sobol and K. Bomben, Handbook of X-ray Photoelectron Spectroscopy, Perkin-Elmer Corporation, Physical Electronics Division: Eden Prairie, MN, 1992.
5. L. Elding and L. Olsson, *J. Phys. Chem.*, 1978, **82**, 69.
6. Y. Shen, Q. Xu, H. Gao and N. Zhu, *Electrochem. Commun.*, 2009, **11**, 1329.
7. Y. Liang, K. Wu, C. Ge, Y. Zhou, Y. Chen, Y. Tang and T. Lu, *Fuel Cells*, 2012, **12**, 946.
